1 **TITLE:** Evidence for protein leverage on Total Energy Intake, but not Body Mass Index, in a  
2 large cohort of older adults

3 **AUTHORS:** Sèwanou H. Honfo<sup>1</sup>, Alistair M. Senior<sup>2,3,4</sup>, Véronique Legault<sup>1</sup>, Nancy Presse<sup>5,6,7</sup>,  
4 Valérie Turcot<sup>5</sup>, Pierrette Gaudreau<sup>8,9</sup>, Stephen J. Simpson<sup>2,3</sup>, David Raubenheimer<sup>2,3</sup>, and Alan  
5 A. Cohen<sup>1,5,10</sup>

6 **AFFILIATIONS:**

7 <sup>1</sup> PRIMUS Research Group, Department of Family Medicine, University of Sherbrooke, 3001  
8 12e Ave N, Sherbrooke, QC, J1H 5N4, Canada.

9 <sup>2</sup> University of Sydney, Charles Perkins Centre, Camperdown, New South Wales 2006,”  
10 Australia.

11 <sup>3</sup> University of Sydney, School of Life and Environmental Science, Camperdown, New South  
12 Wales 2006, Australia.

13 <sup>4</sup> University of Sydney, School of Mathematics and Statistics, Camperdown, New South Wales  
14 2006, Australia.

15 <sup>5</sup> Research Center on Aging, CIUSSS-de-l'Estrie-CHUS, Sherbrooke, QC, Canada.

16 <sup>6</sup> Centre de Recherche de l'Institut Universitaire de Gériatrie de Montréal, Montréal, QC,  
17 Canada.

18 <sup>7</sup> Department of Community Health Sciences, Faculty of Medicine and Health Sciences,  
19 Université de Sherbrooke, Sherbrooke, QC, Canada.

20 <sup>8</sup> Department of Medicine, Université de Montréal, Montréal, QC, Canada.

21 <sup>9</sup> Centre de recherche du centre hospitalier de l'Université de Montréal, Montréal, QC, Canada.

22 <sup>10</sup> Centre de recherche du centre hospitalier Universitaire de Sherbrooke, Sherbrooke, QC,  
23 Canada.

24 **KEYWORDS:** protein leverage hypothesis, aging, NuAge, power law regression, mixture  
25 model

26 **CONTACT INFO:** PRIMUS Research Group, Department of Family Medicine, University of  
27 Sherbrooke, 3001 12e Ave N, Sherbrooke, QC J1H 5N4. Email: [aac2277@cumc.columbia.edu](mailto:aac2277@cumc.columbia.edu)

## 28 **COMPETING INTERESTS**

29 The authors declared no conflict of interest.

## 30 **Abstract**

31 **BACKGROUND:** Protein leverage (PL), the phenomenon of food consuming until absolute  
32 intake of protein meets a target value, regardless of shortfall or overconsuming for other  
33 nutrients in the diet and total energy intake (TEI). Evidence for PL was observed in humans,  
34 recently in a cohort of youth with obesity. This study aimed to test for PL and the protein  
35 leverage hypothesis (PLH) in a cohort of older adults.

36 **METHODS:** We conducted a retrospective analysis of dietary intake in a cohort of 1699  
37 community-dwelling older adults aged 67-84 years from the NuAge cohort. We computed TEI  
38 and the energy contribution (EC) from each macronutrient. The strength of leverage of  
39 macronutrients was assessed through power functions ( $TEI = \mu * EC^L$ ). Body mass index  
40 (BMI) was calculated, and mixture models were fitted to predict TEI and BMI from  
41 macronutrient ECs.

42 **RESULTS:** The mean TEI was 7,673 kJ and macronutrient ECs were 50.4 %, 33.2 % and 16.4  
43 %, respectively for carbohydrates, fat, and protein. High carbohydrate intake was associated with  
44 low fat intake. There was a strong negative association ( $L = -0.37$ ;  $p < 0.001$ ) between the  
45 protein EC and TEI. Each percent of energy intake from protein reduced TEI by 77 kJ on

46 average, *ceteris paribus*. BMI was unassociated with TEI in this cohort, so the PLH could not be  
47 tested here.

48 **CONCLUSIONS:** Findings indicate clear evidence for PL on TEI, but not on BMI, likely  
49 because TEI and BMI become increasingly uncoupled during aging.

## 50 **INTRODUCTION**

51 The macronutrients – carbohydrates, protein, and fat – are the main sources of daily energy  
52 intake [1-2] in the general population, augmented by energy that may come from alcohol and  
53 soluble fibres. Consequently, the regulation of macronutrient intakes and their relationship with  
54 total energy intake (TEI) is central to metabolic science. For each gram catabolised,  
55 carbohydrates and proteins provide 16.7 kJ (4 kcal), while fats yield around 37.7 kJ (9 kcal) [3].  
56 Given that long term calorie intake in excess of calorie expenditure can cause overweight/obesity  
57 to develop [4] and metabolic/inflammatory complications [5], understanding the way  
58 macronutrient intake can intrinsically regulate energy intake would help optimize nutritional  
59 counselling.

60 *A priori* there is a daily energy intake that needs to be achieved for the proper functioning of  
61 an organism, which depends on factors such as physiological state, health, and morphology [4].  
62 However, beyond supplying basal energy, the different macronutrients also have their own  
63 independent and interactive effects on health and appetite. The geometric framework for  
64 nutrition is an approach that was developed to help disentangle the relevant relationships  
65 between nutrients, food environments, the composition of foods and physiology. The geometric  
66 framework for nutrition uses an  $n$ -dimensional state-space where each dimension represents a  
67 food component of interest [6, 4, 7]. In practice, two or three nutritional dimensions usually  
68 related to macronutrients are considered.

69 Geometric framework for nutrition experiments involving intake measured on foods that vary  
70 systematically in the composition of  $n$ -nutrients of interest have demonstrated that animals do  
71 not feed on macronutrients indiscriminately. Rather, different organisms display specific  
72 macronutrient appetites and “intake targets” [8]. When consuming foods that are imbalanced  
73 relative to the nutrient ratio of a target, intake must be compromised based on rules that may lead  
74 to excesses of some nutrients and deficits of others. A range of different rules have been  
75 observed in different species; however, several organisms display ‘protein leverage’ (PL) [9-10]:  
76 food is consumed until absolute intake of protein meets (or approaches) a target value, regardless  
77 of the consequences (i.e., shortfall or overconsumption) for other nutrients in the diet and TEI.  
78 Evidence for PL in humans has been observed in several different contexts, including tightly  
79 controlled experiments in lean humans [11], in humans on high-protein diets [12], in a free-living  
80 human population [13], in a cohort of youth with obesity [14], and in quantitative syntheses of  
81 published data [15, 7].

82 An inevitable consequence of PL is that, as the amount of protein within a food/diet falls, net  
83 food intake must increase to meet the protein target. Where protein is diluted by an energy  
84 yielding nutrient (e.g., carbohydrate or fat), PL will lead to excessive energy intake. The PL  
85 hypothesis (PLH) posits that PL combined with a dilution of dietary protein by carbohydrates  
86 and energy-rich fats in modern (largely western) food supplies is a driving factor behind the  
87 world’s obesity epidemic [4, 7, 14].

88 Most studies on PL to date have concerned younger and active people. However, the world  
89 counted 703 million older persons in 2019, and it is projected in 2050 that one in six people in  
90 the world will be aged 65 years or over [16]. It is not evident that the relationships between  
91 protein intake (through PL), TEI, and body mass index (BMI) observed in younger adults would

92 hold in older adults. Indeed, total daily energy expenditure changes substantially with age and  
93 declines especially for older adults [17]. Furthermore, in mice, high protein intake appears to be  
94 associated with higher mortality in younger mice, but is protective in older mice [18]. Likewise,  
95 in humans, the relationship between TEI and BMI is weak in some cases [19] and nothing is  
96 known about this relationship in older adults. In this study, we considered a cohort of individuals  
97 aged 67-84 years who were enrolled in the Quebec Longitudinal Study on Nutrition and  
98 Successful Aging (NuAge) [20]. The aim of the study was to test for PL and signatures  
99 consistent with the PLH in this cohort of older adults.

## 100 **METHODS**

### 101 **Study cohort**

102 We used data from the NuAge study [20]. NuAge is a longitudinal study that aimed to assess the  
103 effect of diet and nutrition on health in older adults. Participants were selected randomly from  
104 the Quebec Medicare database after stratification for location (Montreal, Laval, Sherbrooke areas  
105 in Quebec, Canada), age (three age groups: 67-72, 73-77, 78-84) and sex (men and women). The  
106 sample consisted of 1793 community-dwelling persons (1587 recruited and 206 volunteers) in  
107 good health at recruitment in 2003-2004 (T1). Participants were re-examined annually for three  
108 years (T2, T3 and T4). Subsequently, 1753 of these participants consented to the incorporation of  
109 their data into the NuAge Database and Biobank, used here. The study and the NuAge Database  
110 and Biobank were approved by the Ethics Committee of the CIUSSS-de-l'Estrie-CHUS  
111 (Quebec, Canada). Here, we considered the cohort T1 (retrospective analysis), except as  
112 otherwise indicated.

113

## 114 **Dietary intake data**

115 Intakes of macronutrients were assessed using three non-consecutive 24-hour dietary recalls (of  
116 which one was during a weekend) using the USDA 5-step multiple-pass method [21]: 1 face-to-  
117 face and 2 telephone interviews [20]. These interviews were conducted by trained research  
118 dietitians, who used graduated utensils and photos of standardized food portions to enhance  
119 portion-size estimation [22]. Only macronutrients coming from foods (i.e., carbohydrates,  
120 protein and fat) and participants with at least two 24-hour dietary recalls were considered.  
121 Macronutrient intakes were computed using the CANDAT-Nutrient Calculation System (version  
122 10, ©Godin London Inc.) based on the 2007b version of the Canadian Nutrient File from Health  
123 Canada and a database of > 1200 additional foods [23]. The mean daily macronutrient intakes  
124 from two to three 24-hour recalls were the data used in these analyses. Participants with at least  
125 one missing observation of macronutrient mean intake, height, or body weight were excluded.  
126 The sample size was therefore reduced to 1,699 participants. Other variables considered for  
127 sensitivity analyses (using stratified analyses) are the sex, age group (as stated above with the  
128 recruitment procedure), self-reported diabetes status [24], smoking status [25], and physical  
129 activity level using the Physical Activity Scale for the Elderly (PASE) [26].

130

## 131 **Statistical data analysis approach**

132 All analyses were performed using version 4.1.1 of R software [27] and were independently  
133 replicated by a second analyst to avoid bias and to ensure accurate results.

## 134 **Determination of strength of leverage**

135 Based on the mean daily protein, carbohydrate, and fat intake expressed in grams/day ( $gP$ ,  $gC$   
136 and  $gF$ ) for each participant, we computed the energy intake from each macronutrient. We

137 estimated TEI using equation (Eq. 1) below and then we calculated the energy contribution (EC;  
138 i.e. % of energy) of each macronutrient to the TEI. BMI, i.e., the ratio between measured weight  
139 (kg) and squared measured height (m), was calculated. In addition, scatter plots were used to  
140 visualise the relationship between TEI and macronutrient contributions alone and in pairs by age  
141 group and sex.

$$142 \quad TEI = 16.7 * (gP + gC) + (37.7 * gF) \quad (\text{Eq. 1})$$

143 The Gauss-Newton algorithm was used to determine the weighted least square estimates of  
144 the parameters of the power function (Eq. 2), to predict the strength of leverage from the relevant  
145 EC from macronutrients toward the TEI [14].

$$146 \quad TEI = \mu * EC^L \quad (\text{Eq. 2})$$

147 2)  
148 where  $\mu$  represents the mean energy intake of a diet composed of 100% of the macronutrient  
149 (expressed in kJ) observed in the cohort, and  $L$  is the strength of leverage. Here, complete  
150 leverage, where the intake is regulated to reach  $\mu$  regardless of the consequences for total energy  
151 intake, would manifest as  $L = -1$ . In contrast  $L = 0$  indicates null macronutrient leverage, in that  
152 the modelled nutritional component and its reciprocal are equally strongly regulated [7, 14].  
153 Positive values (i.e.  $L > 0$ ) indicate that increasing energy from a given macronutrient is  
154 associated with increased TEI; because percentage intake of the three macronutrients sums to  
155 100%, this would generally be detected as the converse of leverage ( $L < 0$ ) in another  
156 macronutrient, and would not necessarily be of particular interest in and of itself.

157 In addition to running analyses on raw TEI, we generated a height-weight adjusted TEI by  
158 linearly adjusting TEI in an additive-effects model of weight and height from which we extracted  
159 the residuals (“adjusted-TEI”). Linearity of the relationships and normality of the residuals were

160 both verified. Power models were also run on adjusted-TEI to evaluate the combined effect of  
161 weight and height on the PL strength when compared to unadjusted TEI. The adjusted TEI  
162 adjusts for the joint effect of height and weight (without the variance in TEI associated with  
163 weight and height). Therefore, if PL becomes stronger (i.e.,  $L$  is more negative) with adjusted  
164 TEI in comparison to unadjusted TEI, it would suggest that the PL effect is particularly robust.

165 Sensitivity analyses were run on population subgroups to assess the generality of findings  
166 (Table S1). We considered two age groups (the youngest: 67-72 and the oldest: 78-84, in the  
167 cohort), sex (men and women), three BMI groups [low:  $BMI \leq 22$ , normal:  $22 < BMI \leq 27$ , high:  
168  $BMI > 27$ ], two groups based on reported diabetes status (non-diabetic and diabetic: all types),  
169 and three smoking groups (never-smoker, former smoker, current smoker). PASE scores were  
170 used to categorize participants' physical activity levels into three groups based on quartiles 1 and  
171 3 ( $PASE < Q1$ ;  $Q1 \leq PASE \leq Q3$ ,  $PASE > Q3$ ). Finally, we also evaluated the link between  
172 TEI at a time  $t$  (e.g.,  $T1$ ) and the gain in body mass reflected by the difference in BMI between  
173 time points  $t$  and  $t+1$  (e.g.,  $T2-T1$ ).

174

### 175 **Compositional modelling of macronutrients contributions toward TEI**

176 Modelling the TEI considering the additive effect of the EC from all three macronutrients  
177 requires the consideration of the linear correlation and mutual constraints existing between these  
178 contributions ( $\sum_i EC_i = 1$ , the main feature of mixture experiments). Failure to consider this  
179 correlation when fitting models to mixture experiments can lead to inappropriate estimation of  
180 the residual variance and potentially inappropriate inference from the inevitably correlated model  
181 coefficients [28]. We fitted five models: a null linear model and the first four Scheffé models  
182 [29] (see supporting information for more details) using the R package *mixexp* [28]. We selected



183 best-fitted models using AIC [30], where the model with lowest score is favoured. Predictions  
184 from the AIC-favoured model were then plotted by projection as a contour plot on a right-angle  
185 mixture triangle [31]. The same models were performed on adjusted-TEI and BMI.

186 Additionally, we noticed that the contributions of fats and carbohydrates were strongly  
187 negatively correlated (Figure S1). This strong negative association between %C and %F means  
188 that the informative information is bivariate along two largely independent axes: %P on the one  
189 hand, and %carbohydrates:%fat (CF) balance on the other. Thus, as a more intuitive but less  
190 formally correct alternative to mixture models, we used principal component analysis (PCA) on  
191 EC from fat and carbohydrate to create a new variable (transformed CF), which explains 93% of  
192 the total variance in fat and carbohydrate intake (Figure S2) and is qualitatively similar to a CF  
193 ratio. The function *princomp* from the built-in R package *stats* [27] was used for this purpose.  
194 The new variable was used as a predictor with the EC from protein in linear models to assess  
195 their effects on TEI, adjusted-TEI, and BMI.

196

## 197 **RESULTS**

### 198 **Cohort features: macronutrient intake, TEI and BMI**

199 Carbohydrates contributed to the TEI of older adults more than proteins and fats (Table 1 and  
200 Figure S3). Generally, men aged 73–84 years (age groups 2 and 3) had the highest TEI, and the  
201 mean TEI of men ( $8\,466 \pm 2\,113$  kJ) was greater than women ( $6\,946 \pm 1\,719$  kJ). However, 4%  
202 of the youngest (67–72 years) recorded a TEI  $> 12\,000$  kJ compared to 2% of the oldest (78–84  
203 years). Most participants with higher EC from protein (EC  $> 25\%$ ) recorded lower TEI  
204 (Figure 1). The median TEIs for women, men, and the whole cohort were 6 780, 8 270, and  
205 7 442 kJ, respectively. EC from carbohydrates and fats present inverse trends on TEI

206 (Figure S1). Higher EC from carbohydrates is related to lower EC from fat and *vice versa*, but  
207 the highest values of TEI were observed for EC from fats ranging between 25 and 45 % and for  
208 EC from carbohydrates ranging between 40 and 60 % (Figure 1). The mean BMI of all  
209 participants is 27.89 and it can be noted that regardless of age group and sex, the mean BMI is  
210 above 27 (the threshold for obesity in older adults). In fact, 908 of the 1 699 participants  
211 considered (53.44%) had obesity, and 1.65% participants had severe cases (BMI > 40) (Table 1).

## 212 **PL in older adults**

213 There was evidence for protein leverage on TEI, indicated by a negative *L* coefficient in power  
214 regressions (-0.37 in the whole cohort), which was statistically significant globally and in all sub-  
215 populations ( $p \leq 0.001$  in most models; Figures 1 and 2). There was also a negative *L* coefficient  
216 for dietary carbohydrates, although this was comparatively weak, ranging from -0.19 to -0.08  
217 depending on the subset. The *L* coefficient for carbohydrates was statistically significant for  
218 High BMI, individuals without diabetes, and when considering the whole cohort, although only  
219 marginally so ( $p = 0.048$ ). This suggests a weaker leverage for carbohydrates than for protein.  
220 Fat intake, by contrast, was positively associated with TEI (0.31 in the whole cohort) and highly  
221 significant in most models (Figures 1 and 2). This is to be expected in a mixture setting where  
222 leverage for protein and a weaker effect of carbohydrates together drive passive intake of fat. PL  
223 was stronger in some subgroups than others (Figure 2): the current smoker group (-0.66), the  
224 older age group (-0.47), the group with diabetes (-0.43), the lowest physical activity quartile  
225 group (-0.42), the normal BMI group (-0.40), and the group with obesity (-0.37). PL strengths  
226 were the same for participants (i) with diabetes and lower PASE, and (ii) without diabetes and  
227 with higher PASE (Figure 2). An interesting result here is the marked increase (absolute value)  
228 of PL after adjusting TEI for weight and height. For example, in the full cohort, the strength of

229 protein leverage increases from -0.37 to -0.54 when adjusting for height and weight, and in  
230 current smokers, it increases from -0.66 to -1.09. This effect was observed for most subgroups  
231 (Figure 2, Table S1).

232 In contrast to the leverage findings, BMI and TEI were completely unassociated with each  
233 other, globally or when stratified by years of follow-up or age group (Table S4, Figures S5 and  
234 S6). This appears to indicate a nearly complete uncoupling of TEI and BMI within this cohort of  
235 older adults. Besides, the lack of relationship when stratified by BMI shows that the relationship  
236 is not simply non-linear. Overall, increases and decreases in both BMI and TEI over time (visits)  
237 were relatively balanced: Figure S6B shows scatterplots symmetrical around no change in either  
238 variable.

239

#### 240 **Optimal macronutrient composition to meet TEI requirements**

241 Model 2 (first Scheffé's mixture experiment model; see supplementary material for more  
242 details), which assesses the linear effects of all ECs from each macronutrient, had the most  
243 favourable AIC among all models when testing for effects of EC on TEI, adjusted-TEI, or BMI  
244 (Figure S7, Tables S2 and S5). For all individuals and age group 67-72 years old, a combination  
245 of moderate EC from carbohydrates and/or fats (40 - 60 %) and a low EC from proteins (10 - 20  
246 %) provided higher TEI, as shown by the model predictions represented by right-angle mixture  
247 triangles (Figure 3). These projections clearly show that the principal gradients in TEI and  
248 weight-height adjusted-TEI are along the protein axis, not the fat or carbohydrate axes (Figure  
249 3A-B) while the principal gradient in BMI is along the carbohydrate and fat axes (Figure 3C).  
250 Considering all individuals, each percent of energy intake from proteins reduced TEI by 77 kJ on  
251 average, *ceteris paribus* (Table S2). Increasing carbohydrates and/or fats at the expense of

252 protein increases TEI passively. This scenario was similar for age groups 67-72 and 78-84 years  
253 (Figure S7). This result was also replicated using the PCA-derived EC from carbohydrate-to-fat  
254 variable (“transformed CF”), which is qualitatively similar to a carbohydrate:fat ratio. For all age  
255 groups, TEI strongly decreased as a function of the transformed CF, implying that for a given  
256 level of EC from protein, TEI is higher in individuals who get a larger percent of their remaining  
257 calories from fat rather than carbohydrates (Figure S8), likely due to the weak leverage of  
258 carbohydrates (Figure 2).

259

## 260 **DISCUSSION**

261 In this retrospective study, we tested for and found extensive evidence of PL in older adults ( $L =$   
262  $-0.37$  globally). This leverage is stronger when TEI is adjusted for the weight/height of  
263 individuals ( $L = -0.54$ ) and is broadly replicated in subpopulations and various sensitivity  
264 analyses. This result is similar to findings by Saner et al. [14], who also showed evidence for PL  
265 in overweight youth. However, we detected no significant effect of percentage energy from  
266 protein on BMI as predicted by the PLH, likely because TEI and BMI appear to be uncoupled in  
267 this population.

268

### 269 **No evidence that protein leverage affects BMI in this healthy aging cohort**

270 In this cohort of healthy older adults, we did not detect signals consistent with PLH (e.g., an  
271 effect of energy from protein on BMI). This result however is not necessarily surprising because  
272 we found that TEI and BMI are uncorrelated (no clear trend for TEI or BMI over time, nor any  
273 association between the two); PLH posits that the leverage of protein on TEI will translate to an  
274 effect on BMI because excess energy intake increases adiposity. This uncoupling could be

275 because of the short-term timescale over which dietary intakes were measured compared to the  
276 long duration over which changes in body mass accumulate. In another perspective, it can reflect  
277 a gradual adaptation of the system to lower caloric intake by reducing energy expenditure [32];  
278 the body requires less energy to ensure the system's basic functionalities [33]. Accordingly,  
279 metabolism can become more efficient, allowing the body to survive with less energy than  
280 bodies of similar weight that have not been deprived of calories [34].

281 However, we could also question whether BMI is indeed a fair metric of PLH in older adults.  
282 For instance, sarcopenia, a chronic disease prevalent in older adults, is a progressive loss of  
283 muscle mass and strength which is related to age, sex and levels of physical activity [35-36].  
284 Therefore, a low or decreasing BMI may be associated with the presence of sarcopenia [37-38].  
285 Because both sarcopenia and obesity may coexist within an individual and confound each other  
286 via BMI, BMI is increasingly imprecise with advancing age, and DEXA fat mass might be a  
287 more relevant metric for PLH in future studies.

288 Along these lines, we thus hypothesized that high protein intake could prevent weight loss in  
289 the context of low BMI, but also prevent weight gain in the context of high BMI (obesity). We  
290 therefore stratified the analyses by BMI, predicting a positive relationship between protein EC  
291 and BMI in the low BMI subgroup, and a negative relationship between protein EC and BMI in  
292 the high BMI subgroup (Figure S4). There was no evidence for such effects, and if anything, we  
293 observed the inverse: a hint of protein leverage on BMI in the lowest BMI stratum.

294

### 295 **Protein leverage in smokers**

296 In this cohort of older adults, current smokers recorded the strongest PL, more than 50% higher  
297 than in the full cohort ( $L=-1.09$  vs.  $-0.66$  in the weight-height adjusted analyses). Despite the

298 small proportion of this subgroup in the study sample (85 individuals; 5%), this finding is  
299 noteworthy as it points to a potential association between PL and smoking. Indeed, this increase  
300 in PL might be associated with high concentrations of the fibroblast growth factor 21 (FGF21).  
301 FGF21 is a liver-derived peptide hormone that stimulates glucose uptake and lipid metabolism  
302 [39] and regulates protein phosphorylation and insulin sensitivity [40]. Recent studies have  
303 shown a significant and positive association between regular smoking and high concentrations of  
304 FGF21 [41-42]. In addition, an evaluation of FGF21 levels in humans showed differential  
305 expression for people who smoked every day. They also showed its role in the regulation of  
306 sweet food intake in adults, which could affect nutrient-specific appetite [42]. Furthermore,  
307 FGF21 is upregulated in protein deprivation and obesity, supporting a possible association  
308 between PL and FGF21 [43].

309

### 310 **Limitations and strengths of the study**

311 Nonlinear modeling is challenging because it requires identifying the best nonlinear function to  
312 fit the data. In this study, we opted for the power law function, which is not necessarily proven to  
313 be the best nonlinear function for our data. We have not investigated other nonlinear functions.  
314 However, the power function is the most used in recent studies on PL and PLH [14]. Moreover,  
315 other alternatives to Scheffé's mixture model (used in this study) can be investigated. The  
316 nonlinear structural equation mixture approach, which integrates the specification of the  
317 nonlinear function and the flexibility of semiparametric structural equation mixture approaches  
318 for approximating the nonnormality of latent predictor variables, may be worth investigating  
319 [44]. Further, the isometric log-ratio function, which is an intuitive approach to stabilize

320 imbalance weight distributions in mixture experiments, is also a possible approach to explore for  
321 mixture experiments analyses [45].

322 This study focused on a population of community dwelling older adults who reside in Quebec  
323 and were generally healthy at recruitment [20]. This population is relatively homogeneous.  
324 Given the diversity of lifestyles of different populations around the world, we are aware that this  
325 cohort is not representative of older adults in general. The study also considered four follow-up  
326 time points over ~3 years, a follow-up that may be insufficient. More data over a longer period  
327 could allow us to observe relevant patterns between TEI and BMI. However, associations  
328 between TEI and BMI are weaker over T1-T4 than over a one-year interval (e.g., T1-T2; Table  
329 S4), so it is unlikely results would be stronger with longer follow-up.

330 While some observational designs, combined with appropriate statistical methods, can give  
331 strong inferences on causality, this study was not designed for such inferences, and cannot make  
332 claims about causality. Nonetheless, the clear confirmation of theoretical predictions for specific  
333 functional relationships, consistent with findings in other cohorts and in animal models, lends  
334 credence to our findings as representing broad patterns of interest.

335 Despite these limitations, this study has several strengths and is generalizable to older adults  
336 in other Canadian provinces and Western countries. It used data from the NuAge study [20],  
337 which has a large sample. We used state-of-the-art statistical methods to analyze macronutrient  
338 compositions. Intakes of macronutrients were assessed using three non-consecutive 24-hour  
339 dietary recalls (of which one during weekend) using the USDA 5-step multiple-pass method  
340 [21]: one face-to-face and two telephone interviews [20]. This approach is also a state-of-the-art  
341 quantification method of dietary intake in an observational context. Additionally, the interviews  
342 were conducted by trained research dietitians [22].

343

## 344 **CONCLUSIONS**

345 This study assessed evidence for PL in adults aged between 67 and 84 years. We showed  
346 evidence for PL on TEI in the cohort, but no association between TEI and BMI was detected,  
347 making tests of PLH irrelevant. TEI and BMI thus appear to be decoupled in this cohort, in  
348 contrast to most younger cohorts. The confusion may reflect the weaker and more complex  
349 relationship of BMI and health status in older adults. These results are consistent with the  
350 hypothesis that eating more protein during aging can prevent muscle loss and provide the  
351 required energy to prevent weight loss [22, 43] and sarcopenia, which is a disorder that is  
352 becoming increasingly prevalent among people with obesity in older age [35]. PL was stronger  
353 for older adult men, people with diabetes, current smokers, and those with higher BMI or lower  
354 physical activity, suggesting that these groups would be even more favored to increase their  
355 protein intake to control their body weight and preserve their muscle mass.

356

## 357 **FUNDING:**

358 The NuAge Study was supported by a research grant from the Canadian Institutes of Health  
359 Research (CIHR; MOP-62842). The NuAge Database and Biobank are supported by the Fonds  
360 de recherche du Québec (FRQ; 2020-VICO-279753), the Quebec Network for Research on  
361 Aging, a thematic network funded by the Fonds de Recherche du Québec - Santé (FRQS) and by  
362 the Merck-Frosst Chair funded by La Fondation de l'Université de Sherbrooke. NP is a Junior 1  
363 Research Scholar of the FRQS. AAC is a Senior Research Scholar of the FRQS. PG is a fellow  
364 of the Canadian Academy of Health Sciences.

365



## 366 **AUTHOR CONTRIBUTIONS**

367 SHH conducted data analysis data and wrote the manuscript. AAC designed the study and  
368 reviewed the manuscript. NP, VT gave access to NuAge data and reviewed the manuscript. VL,  
369 PG, SJS and DR reviewed the manuscript.

370

## 371 **COMPETING INTERESTS**

372 The authors declared no conflict of interest.

373

374

375

## 376 **DATA AVAILABILITY**

377 All data supporting the conclusions of these analyses are presented in the manuscript or the  
378 supplementary material. Details of additional data can be obtained from the study authors upon  
379 reasonable request.

## 380 **REFERENCES**

- 381 1. Bourre JM. Effects of nutrients (in food) on the structure and function of the nervous  
382 system: update on dietary requirements for brain. Part 2: macronutrients. *J Nutr Health*  
383 *Aging*. 2009;10(5):386-399.
- 384 2. Hawkesford M, Horst W, Kichey T, Lambers H, Schjoerring J, Møller IS, et al. Functions of  
385 macronutrients. In: Marschner P (eds). *Marschner's Mineral Nutrition of Higher Plants*. 3rd  
386 ed. Academic Press, 2012. pp 135-189.
- 387 3. Burton BT, Foster WR (eds). *Human Nutrition*. 4th ed. McGraw-Hill Book Company, 1988.

- 388 4. Simpson SJ, Raubenheimer D. Obesity: the protein leverage hypothesis. *Obes Rev.*  
389 2005;6(2):133-142.
- 390 5. Després JP, Lemieux I. Abdominal obesity and metabolic syndrome. *Nature.* 2006;444:881-  
391 887.
- 392 6. Simpson SJ, Batley R, Raubenheimer D. Geometric analysis of macronutrient intake in  
393 humans: the power of protein? *Appetite.* 2003;41(2):123-140.
- 394 7. Raubenheimer D, Simpson SJ. Protein leverage: theoretical foundations and ten points of  
395 clarification. *Obesity.* 2019;27(8):1225-1238.
- 396 8. Simpson SJ, Raubenheimer D. The nature of nutrition: a unifying framework. *Aust J Zool.*  
397 2012;59(6):350-368.
- 398 9. Allaway D, de Alvaro CH, Hewson-Hughes A, Staunton R, Morris P, Alexander J. Impact  
399 of dietary macronutrient profile on feline body weight is not consistent with the protein  
400 leverage hypothesis. *Br J Nutr.* 2018;120(11):1310-1318.
- 401 10. Sørensen A, Mayntz D, Raubenheimer D, Simpson SJ. Protein leverage in mice: the  
402 geometry of macronutrient balancing and consequences for fat deposition. *Obesity.*  
403 2008;16(3): 566-571.
- 404 11. Gosby AK, Conigrave AD, Lau NS, Iglesias MA, Hall RM, Jebb SA, et al. Testing protein  
405 leverage in lean humans: a randomised controlled experimental study. *PLoS One.*  
406 2011;6(10):e25929.
- 407 12. Martens EA, Lemmens SG, Westerterp-Plantenga MS. Protein leverage affects energy  
408 intake of high-protein diets in humans. *Am J Clin Nutr.* 2013;97(1):86-93.

- 409 13. Martinez-Cordero C, Kuzawa CW, Sloboda DM, Stewart J, Simpson SJ, Raubenheimer D.  
410 Testing the Protein Leverage Hypothesis in a free-living human population. *Appetite*.  
411 2012;59(2):312-315.
- 412 14. Saner C, Tassoni D, Harcourt BE, Kao KT, Alexander EJ, McCallum Z, et al. Evidence for  
413 protein leverage in children and adolescents with obesity. *Obesity*. 2020;28(4):822-829.
- 414 15. Gosby AK, Conigrave AD, Raubenheimer D, Simpson SJ. Protein leverage and energy  
415 intake. *Obes Rev*. 2014;15(3):183-191.
- 416 16. United Nations, Department of Economic and Social Affairs, Population Division (eds).  
417 World population ageing 2019: Highlights. United Nations, 2019.
- 418 17. Pontzer H, Yamada Y, Sagayama H, Ainslie PN, Andersen LF, Anderson LJ, et al. Daily  
419 energy expenditure through the human life course. *Science*. 2021;373(6556):808-812.
- 420 18. Senior AM, Solon-Biet SM, Cogger VC, Le Couteur DG, Nakagawa S, Raubenheimer D, et  
421 al. Dietary macronutrient content, age-specific mortality and lifespan. *Proc R Soc Lond B*  
422 *Biol Sci*. 2019;286:20190393.
- 423 19. Austin GL, Ogden LG, Hill JO. Trends in carbohydrate, fat, and protein intakes and  
424 association with energy intake in normal-weight, overweight, and obese individuals: 1971–  
425 2006. *Am J Clin Nutr*. 2011;93(4):836-843.
- 426 20. Gaudreau P, Morais JA, Shatenstein B, Gray-Donald K, Khalil A, Dionne I, et al. Nutrition  
427 as a determinant of successful aging: description of the Quebec longitudinal study Nuage  
428 and results from cross-sectional pilot studies. *Rejuvenation Res*. 2007;10(3):377-386.
- 429 21. Moshfegh AJ, Borrud L, Perloff B, LaComb R. Improved method for the 24-hour dietary  
430 recall for use in national surveys. *FASEB J*. 1999;13(4):A603.

- 431 22. Gray-Donald K, Arnaud-McKenzie DS, Gaudreau P, Morais JA, Shatenstein B, Payette H.  
432 Protein intake protects against weight loss in healthy community-dwelling older adults. *J*  
433 *Nutr.* 2014;144(3):321-326.
- 434 23. Huang HH, Cohen AA, Gaudreau P, Auray-Blais C, Allard D, Boutin M, et al. Vitamin B-  
435 12 intake from dairy but not meat is associated with decreased risk of low vitamin B-12  
436 status and deficiency in older adults from Quebec, Canada. *J Nutr.* 2022;nxac143.
- 437 24. Resnick HE, Valsania P, Halter JB, Lin X. Relation of weight gain and weight loss on  
438 subsequent diabetes risk in overweight adults. *J Epidemiol Community Health.*  
439 2000;54(8):596-602.
- 440 25. Wannamethee SG, Shaper AG, Walker M. Weight change, body weight and mortality: the  
441 impact of smoking and ill health. *Int J Epidemiol.* 2001;30(4):777-786.
- 442 26. Washburn RA, McAuley E, Katula J, Mihalko SL, Boileau RA. The physical activity scale  
443 for the elderly (PASE): evidence for validity. *J Clin Epidemiol.* 1999;52(7):643-651.
- 444 27. R Core Team (eds). *R: A Language and Environment for Statistical Computing.* R  
445 Foundation for Statistical Computing, 2022.
- 446 28. Lawson J, Willden C. Mixture experiments in R using mixexp. *J Stat Softw.* 2016;72(2):1-  
447 20.
- 448 29. Scheffé H. Experiments with mixtures. *J R Stat Soc Series B Stat Methodol.*  
449 1958;20(2):344-360.
- 450 30. Akaike H. Information theory and an extension of the maximum likelihood principle. In:  
451 Parzen E, Tanabe K, Kitagawa G (eds). *Selected Papers of Hirotugu Akaike.* Springer; 1998:  
452 199–213.

- 453 31. Raubenheimer D. Toward a quantitative nutritional ecology: the right-angled mixture  
454 triangle. *Ecol Monogr.* 2011;81(3):407-427.
- 455 32. Greenway F. Physiological adaptations to weight loss and factors favouring weight regain.  
456 *Int J Obes.* 2015;39:1188-1196.
- 457 33. Leibel RL, Rosenbaum M, Hirsch, J. Changes in energy expenditure resulting from altered  
458 body weight. *N Engl J Med.* 1995;332:621-628.
- 459 34. DeLany JP, Kelley DE, Hames KC, Jakicic JM, Goodpaster BH. Effect of physical activity  
460 on weight loss, energy expenditure, and energy intake during diet induced weight loss.  
461 *Obesity* 2014;22(2):363-370.
- 462 35. Batsis JA, Villareal DT. Sarcopenic obesity in older adults: aetiology, epidemiology and  
463 treatment strategies. *Nat Rev Endocrinol.* 2018;14:513-537.
- 464 36. Hengeveld LM, Boer JM, Gaudreau P, Heymans MW, Jagger C, Mendonça N, et al.  
465 Prevalence of protein intake below recommended in community-dwelling older adults: a  
466 meta-analysis across cohorts from the PROMISS consortium. *J Cachexia Sarcopenia*  
467 *Muscle.* 2020;11(5):1212-1222.
- 468 37. Cruz-Jentoft AJ, Bahat G, Bauer J, Boirie Y, Bruyère O, Cederholm T, et al. Sarcopenia:  
469 revised European consensus on definition and diagnosis. *Age Ageing.* 2019;48(4):601.
- 470 38. Tessier A, Wing SS, Rahme E, Morais JA, Chevalier S. Physical function-derived  
471 cut-points for the diagnosis of sarcopenia and dynapenia from the Canadian longitudinal  
472 study on aging. *J Cachexia Sarcopenia Muscle.* 2019;10(5):985-999.
- 473 39. Mashili FL, Austin RL, Deshmukh AS, Fritz T, Caidahl K, Bergdahl K, et al. Direct effects  
474 of FGF21 on glucose uptake in human skeletal muscle: implications for type 2 diabetes and  
475 obesity. *Diabetes Metab Res Rev.* 2011;27(3):286-297.

- 476 40. Chavez AO, Molina-Carrion M, Abdul-Ghani MA, Folli F, DeFronzo RA, Tripathy D.  
477 Circulating fibroblast growth factor-21 is elevated in impaired glucose tolerance and type 2  
478 diabetes and correlates with muscle and hepatic insulin resistance. *Diabetes Care*.  
479 2009;32(8):1542-1546.
- 480 41. Nakanishi K, Ishibashi C, Ide S, Yamamoto R, Nishida M, Nagatomo I, et al. Serum FGF21  
481 levels are altered with various factors including lifestyle behaviors. *Sci Rep*. 2021;11:22632.
- 482 42. Søbørg S, Sandholt CH, Jespersen NZ, Toft U, Madsen AL, von Holstein-Rathlou S, et al.  
483 FGF21 is a sugar-induced hormone associated with sweet intake and preference in humans.  
484 *Cell Metab*. 2017;25(5):1045-1053.
- 485 43. Coelho-Júnior HJ, Milano-Teixeira L, Rodrigues B, Bacurau R, Marzetti E, Uchida M.  
486 Relative protein intake and physical function in older adults: a systematic review and meta-  
487 analysis of observational studies. *Nutrients*. 2018;10(9):1330.
- 488 44. Kelava A, Nagengast B, Brandt H. A nonlinear structural equation mixture modeling  
489 approach for nonnormally distributed latent predictor variables. *Struct Equ Modeling*.  
490 2014;21(3):468-481.
- 491 45. Parent SÉ. Why we should use balances and machine learning to diagnose ionomes.  
492 *Authorea Prepr*. 2020,1-13.
- 493  
494  
495  
496

497 **Figure 1.** Trends of TEI according to energy contribution (EC) for each macronutrient (%) with  
498 differentiation of individuals by their sex for (A) all individuals, (B) individuals with low BMI  
499 (BMI  $\leq 22$ ), (C) individuals with normal BMI ( $22 < \text{BMI} \leq 27$ ) and (D) individuals with high  
500 BMI (BMI  $> 27$ ). Curves represent power law functions for each sex (red and blue for women  
501 and men, respectively) and joint (black).

502

503

504 **Figure 2.** Nonlinear power regression estimates of macronutrients strength of leverage regarding  
505 unadjusted total energy intake (TEI), weight-height-adjusted TEI and body mass index. Each  
506 graph has three panels of forest plots (for the three macronutrients), and each line represents the  
507 estimated strength of leverage with its confidence interval.  
508  
509



510 **Figure 3.** Right-angle mixture triangles showing effects of energy contribution (EC) from each  
511 macronutrient on **(A)** total energy intake (TEI), **(B)** height and weight adjusted-TEI and **(C)** body  
512 mass index (BMI) in all individuals and age-group subsets (67-72, 78-84 years). Surfaces  
513 indicate values of TEI (kJ), adjusted-TEI (kJ) or BMI (kg/m<sup>2</sup>), where blue is the minimal value  
514 on the surface and red is the maximal value.

**A**

• Woman • Man

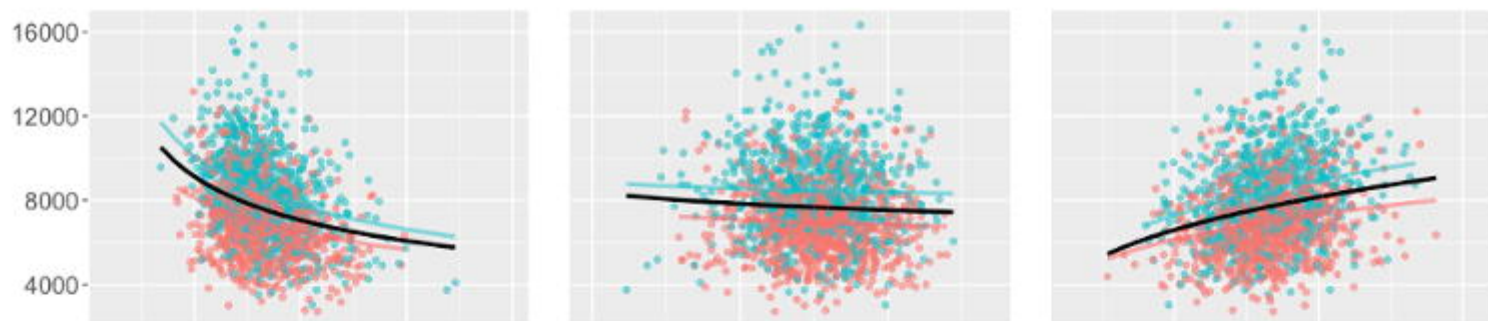**B**

Total energy intake (kJ)

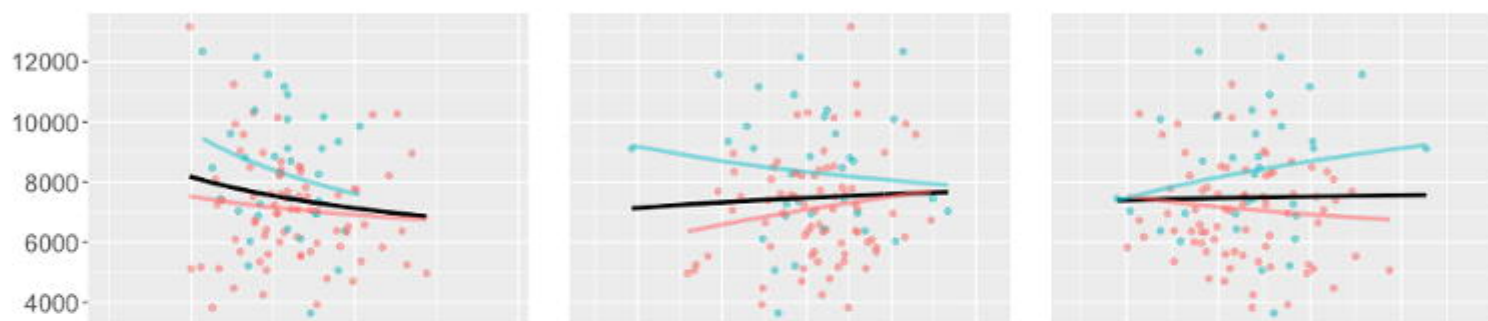**C**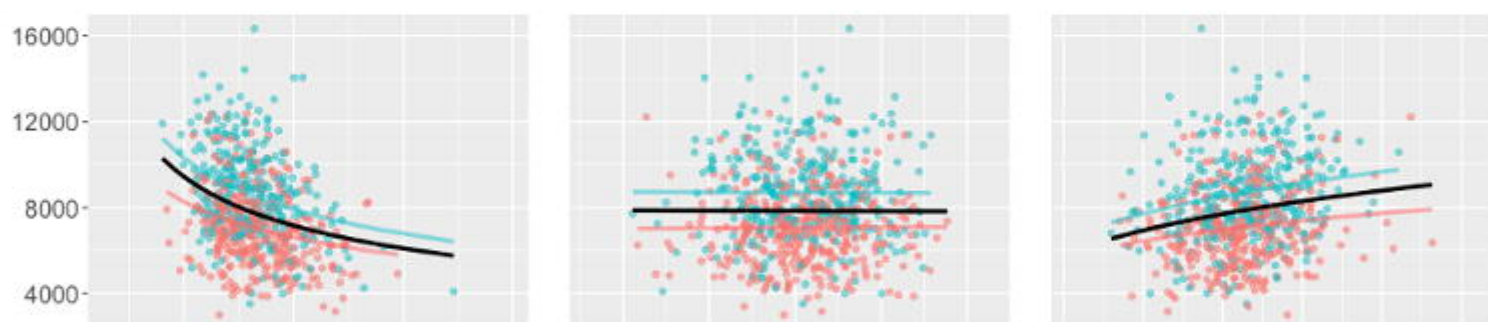**D**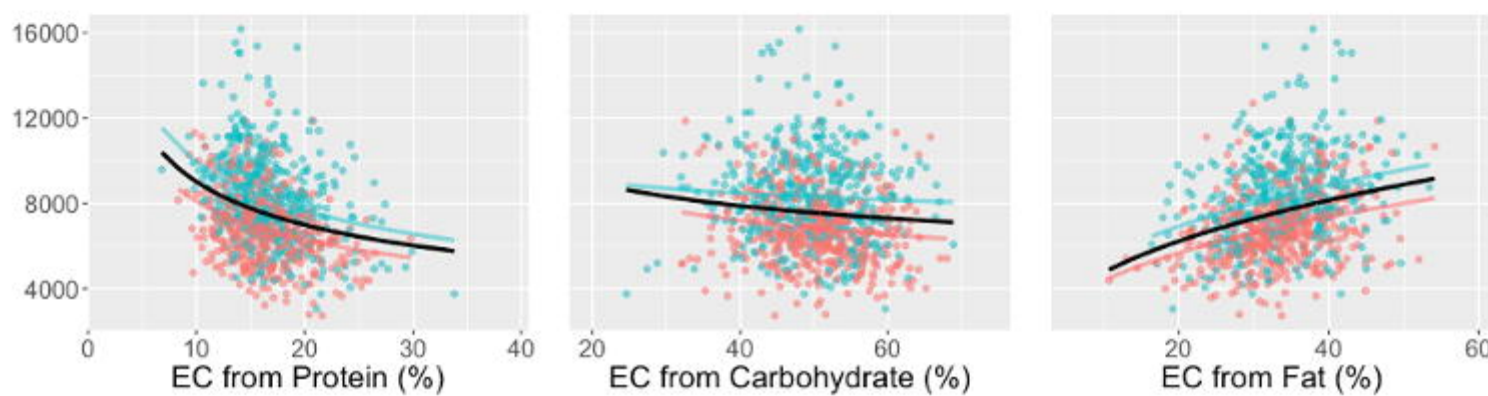

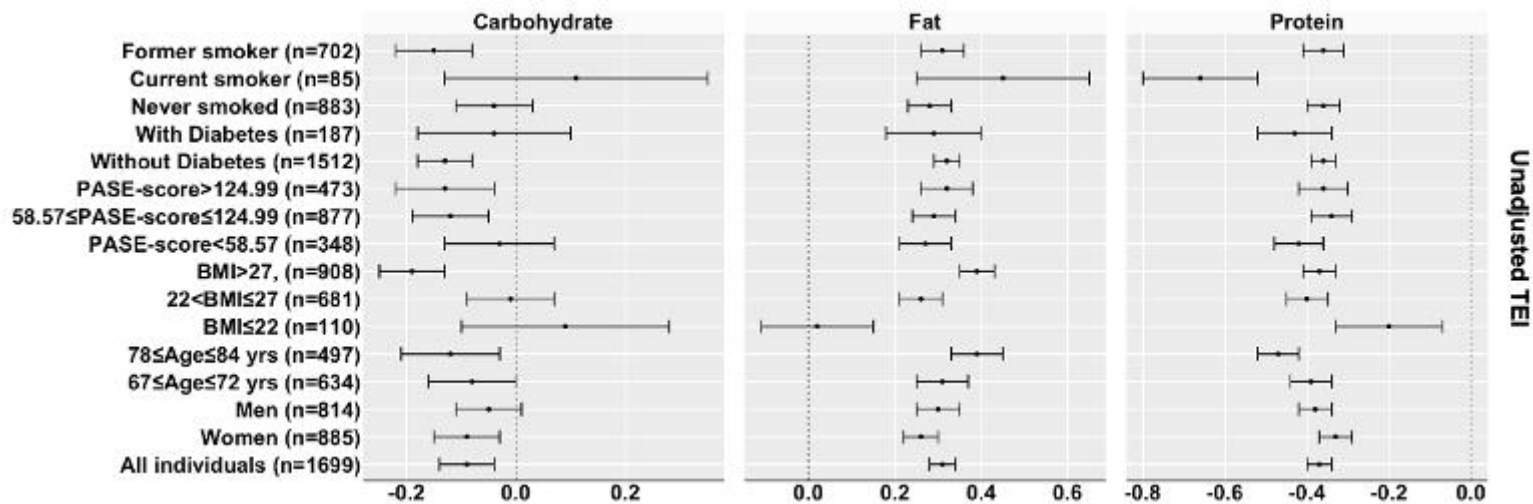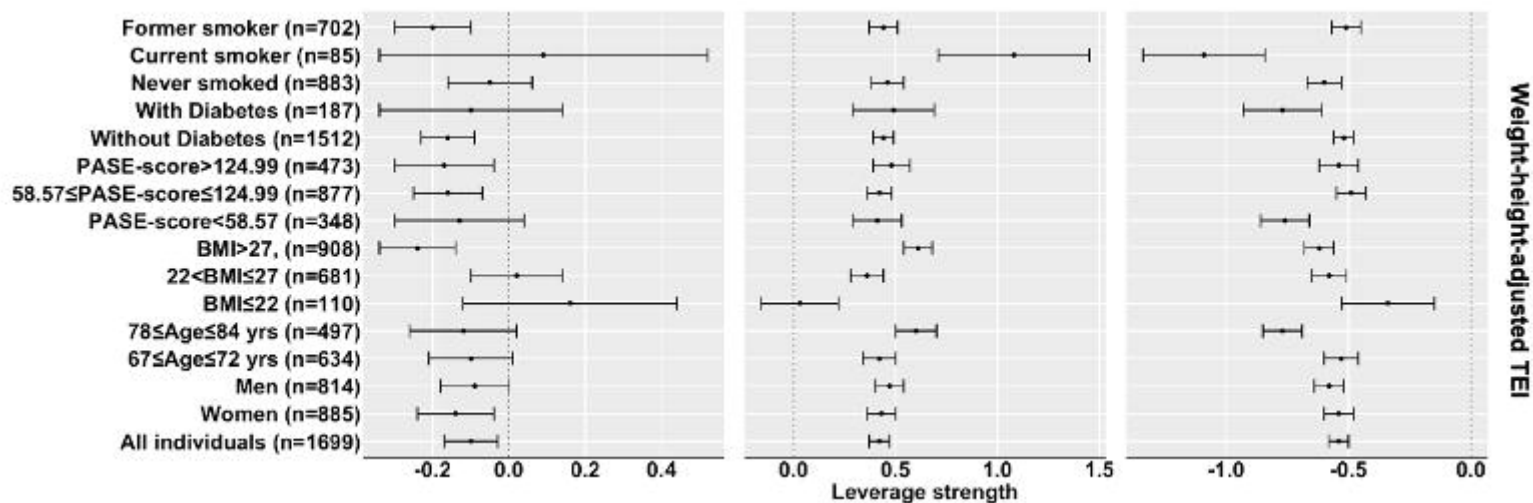

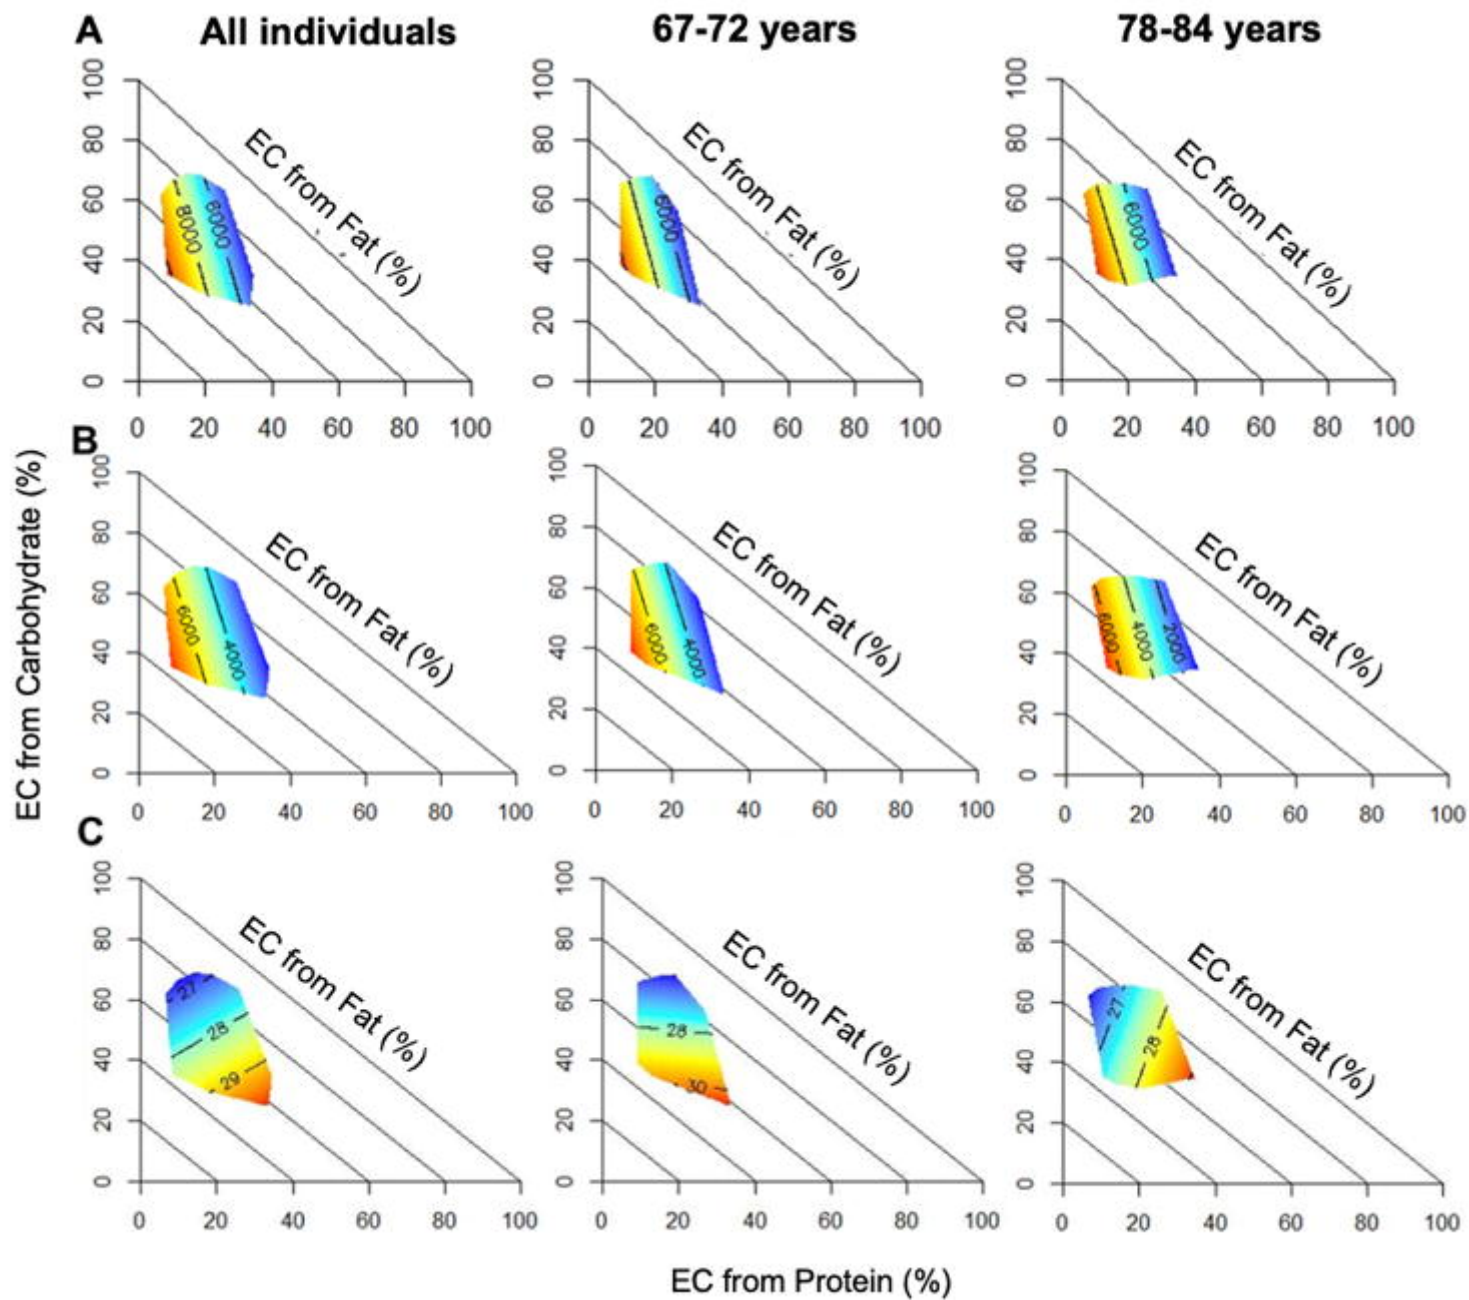

Source: https://medrxiv.org/content/10.1101/2023.06.14.23291391v1.full.pdf
